# Supplementary material for: Wearable Multi-Frequency and Multi-Segment Bioelectrical Impedance Spectroscopy for Unobtrusively Tracking Body Fluid Shifts during Physical Activity in Real-Field Applications: A Preliminary Study
Source: MDPI journal article supplement (doi:10.3390/s16050673), 2016-05-11
Supplement: s1 [file s1]

# Supplementary Materials: Wearable Multi-Frequency and Multi-Segment Bioelectrical Impedance Spectroscopy for Unobtrusively Tracking Body Fluid Shifts during Physical Activity in Real-Field Applications: A Preliminary Study

Federica Villa, Alessandro Magnani, Martina A. Maggioni, Alexander Stahn, Susanna Rampichini, Giampiero Merati and Paolo Castiglioni

The following table lists the more popular devices on the market for assessing Bioelectrical Impedance Spectroscopy, BIS (*i.e.*, body impedance analysis performed by considering more than one frequency). Few devices only provide measures at different segments simultaneously, and in this case such devices consider only the limbs and the trunk as measured segments. None of the listed systems is wearable. When the same manufacturer offers different products, only the more complete model is listed.

**Table S1.** Characteristics of the main BIS devices currently found in the market.

| Model                          | Number of Frequencies | Range      | Multi Segment | Wearable |
|--------------------------------|-----------------------|------------|---------------|----------|
| Impedimed SFB7 [1]             | 256                   | 4–1000 kHz | No            | No       |
| XiTRON Hydra 4200 [2]          | 50                    | 5–1000 kHz | No            | No       |
| Bodystat multiscan 5000 [3]    | 50                    | 5–1000 kHz | No            | No       |
| Bodycom MF HEXA [4]            | 6                     | 5–250 kHz  | No            | No       |
| Fresenius Medical Care BCM [5] | 50                    | 5–1000 kHz | No            | No       |
| GE Healthcare Inbody 720 [6]   | 6                     | 1–1000 kHz | Yes           | No       |
| Tanita MC-980Uplus [7]         | 3                     | 5–250 kHz  | Yes           | No       |
| Rice Lake D1000-3 [8]          | 3                     | 5–250 kHz  | Yes           | No       |

## References

1. Imp<sup>TM</sup> SFB7. Available online: [https://www.impedimed.com/wp-content/products/SFB7/SFB7\\_CA\\_Brochure.pdf](https://www.impedimed.com/wp-content/products/SFB7/SFB7_CA_Brochure.pdf) (accessed on 5 May 2016).
2. XiTRON Hydra 4200 Specifications. Available online: <http://www.xitrontech.com/assets/002/5853.pdf> (accessed on 5 May 2016).
3. Clinical Practice: Multiscan 5000. Available online: <http://www.bodystat.com/pdf/spreads/multiscan.pdf> (accessed on 5 May 2016).
4. Bodycomp MF HEXA. Available online: [http://www.akern.com/images/DP\\_BC\\_MF\\_HEXA\\_ITA\\_Rev0.pdf](http://www.akern.com/images/DP_BC_MF_HEXA_ITA_Rev0.pdf) (accessed on 5 May 2016).
5. BCM—Body Composition Monitor. Available online: <http://www.bcm-fresenius.com/16.htm> (accessed on 5 May 2016).
6. Lunar InBody720 Spec Sheet. Available online: <http://www3.gehealthcare.com.sg/~media/documents/us-global/products/metabolic-health/product%20spec%20sheets/inbody/gehealthcare-inbody-720-productspec.pdf> (accessed on 5 May 2016).
7. MC-980Uplus Multi Frequency Segmental Body Composition Analyzer. Available online: <http://www.tanita.com/en/mc-980uplus> (accessed on 5 May 2016).
8. Rice Lake D1000-3. Available online: [https://www.ricelake.com/docs/prodinfo/rlws\\_catalog/Individual\\_medical/MS\\_Body\\_Comp\\_Full\\_Consult.pdf](https://www.ricelake.com/docs/prodinfo/rlws_catalog/Individual_medical/MS_Body_Comp_Full_Consult.pdf) (accessed on 5 May 2016).
